# Supplementary material for: Socio-demographic and health-related determinants of patients’ overall rating and experiences of cancer care
Source: Springer Nature journal article supplement (doi:10.1186/s12885-023-11445-6), 2023-09-29
Supplement: MOESM1 [file 26105510]

**Suppl. Table 1. Sensitivity analyses on the primary analyses with a low rating of care defined as a rating between 0 and 8 (instead of between 0 and 7)**

| Variable                                                               | N (%)       | Low rating of overall cancer care n (%) | Crude OR (95% CI) | Adjusted OR* (95% CI) |
|------------------------------------------------------------------------|-------------|-----------------------------------------|-------------------|-----------------------|
| <b>Socio-demographic characteristics</b>                               |             |                                         |                   |                       |
| Sex                                                                    |             |                                         | p = 0.002         | p = 0.019             |
| Men                                                                    | 1046 (39.0) | 415 (39.7)                              | 1                 | 1                     |
| Women                                                                  | 1634 (61.0) | 746 (45.7)                              | 1.28 (1.09-1.50)  | 1.24 (1.03-1.48)      |
| Age                                                                    |             |                                         | p < 0.001         | -                     |
| 18-54                                                                  | 591 (22.5)  | 289 (48.9)                              | 1                 |                       |
| 55-64                                                                  | 668 (25.4)  | 312 (46.7)                              | 0.92 (0.73-1.14)  |                       |
| 65-74                                                                  | 848 (32.2)  | 338 (39.9)                              | 0.69 (0.56-0.86)  |                       |
| 75+                                                                    | 524 (19.9)  | 202 (38.6)                              | 0.66 (0.52-0.83)  |                       |
| Marital status                                                         |             |                                         | p = 0.103         | -                     |
| Married/partnership                                                    | 1598 (59.8) | 673 (42.1)                              | 1                 |                       |
| Separated/divorced                                                     | 510 (19.1)  | 228 (44.7)                              | 1.35 (1.05-1.75)  |                       |
| Single                                                                 | 274 (10.3)  | 136 (49.6)                              | 1.11 (0.91-1.36)  |                       |
| Widowed                                                                | 289 (10.8)  | 120 (41.5)                              | 0.98 (0.76-1.26)  |                       |
| Living situation                                                       |             |                                         | p = 0.488         | -                     |
| Living with adult partner                                              | 1770 (66.2) | 752 (42.5)                              | 1                 |                       |
| Living without adult partner                                           | 767 (28.7)  | 345 (45.0)                              | 1.11 (0.93-1.31)  |                       |
| Other living arrangements                                              | 138 (5.2)   | 58 (42.0)                               | 0.98 (0.69-1.39)  |                       |
| Education                                                              |             |                                         | P = 0.733         | -                     |
| Primary                                                                | 418 (15.9)  | 188 (45.0)                              | 1                 |                       |
| Secondary                                                              | 1314 (50.0) | 563 (42.9)                              | 0.92 (0.73-1.14)  |                       |
| Tertiary                                                               | 898 (34.1)  | 386 (43.0)                              | 0.92 (0.73-1.17)  |                       |
| Professional activity status                                           |             |                                         | p = 0.001         | -                     |
| Active                                                                 | 729 (27.4)  | 325 (44.6)                              | 1                 |                       |
| Disability or sick leave                                               | 287 (10.8)  | 146 (50.9)                              | 1.29 (0.98-1.69)  |                       |
| Retired                                                                | 1395 (52.5) | 555 (39.8)                              | 0.82 (0.69-0.98)  |                       |
| Other                                                                  | 248 (9.3)   | 121 (48.8)                              | 1.18 (0.89-1.58)  |                       |
| Principal language                                                     |             |                                         | p = 0.180         | -                     |
| French                                                                 | 2312 (86.3) | 991 (42.9)                              | 1                 |                       |
| Other                                                                  | 367 (13.7)  | 171 (46.6)                              | 1.16 (0.93-1.45)  |                       |
| Nationality                                                            |             |                                         | p = 0.007         | p = 0.390             |
| Swiss                                                                  | 2230 (83.3) | 219 (49.1)                              | 1                 | 1                     |
| Non-Swiss                                                              | 446 (16.7)  | 940 (42.2)                              | 1.32 (1.08-1.62)  | 1.11 (0.88-1.39)      |
| Health literacy (difficulty understanding written medical information) |             |                                         | p < 0.001         | p < 0.001             |
| High (never/occasionally)                                              | 1905 (72.3) | 707 (37.1)                              | 1                 | 1                     |
| Low (sometimes/often/always)                                           | 731 (27.7)  | 436 (59.6)                              | 2.50 (2.10-2.98)  | 2.15 (1.78-2.61)      |
| Preference for making medical decisions                                |             |                                         | p = 0.001         | p < 0.001             |
| With doctor                                                            | 2239 (84.3) | 964 (43.1)                              | 1                 | 1                     |
| Alone                                                                  | 249 (9.4)   | 128 (51.4)                              | 1.40 (1.08-1.82)  | 1.40 (1.05-1.86)      |
| Doctor                                                                 | 169 (6.4)   | 57 (33.7)                               | 0.67 (0.48-0.94)  | 0.52 (0.36-0.75)      |
| Had trouble paying household bills                                     |             |                                         | p = 0.003         | -                     |
| No                                                                     | 2091 (78.9) | 870 (41.6)                              | 1                 |                       |
| Yes                                                                    | 559 (21.1)  | 272 (48.7)                              | 1.33 (1.10-1.60)  |                       |
| Forwent care due to costs                                              |             |                                         | p < 0.001         | p = 0.004             |
| No                                                                     | 2294 (86.6) | 939 (40.9)                              | 1                 | 1                     |
| Yes                                                                    | 354 (13.4)  | 200 (56.5)                              | 1.87 (1.49-2.35)  | 1.45 (1.12-1.87)      |
| <b>Health-related characteristics</b>                                  |             |                                         |                   |                       |
| Type of cancer                                                         |             |                                         | p = 0.029         | -                     |
| Breast                                                                 | 1084 (40.2) | 509 (47.0)                              | 1                 |                       |
| Hematological                                                          | 432 (16.0)  | 182 (42.1)                              | 0.82 (0.66-1.03)  |                       |
| Lung                                                                   | 405 (15.0)  | 113 (40.2)                              | 0.78 (0.62-0.98)  |                       |
| Colorectal                                                             | 281 (10.4)  | 113 (40.2)                              | 0.76 (0.58-0.99)  |                       |
| Prostate                                                               | 230 (8.5)   | 101 (43.9)                              | 0.88 (0.66-1.18)  |                       |
| Melanoma                                                               | 138 (5.1)   | 53 (38.4)                               | 0.70 (0.49-1.01)  |                       |
| Several                                                                | 126 (4.7)   | 43 (34.1)                               | 0.59 (0.40-0.86)  |                       |

|                                           |             |            |                  |                  |
|-------------------------------------------|-------------|------------|------------------|------------------|
| Type of diagnosis                         |             |            | p = 0.566        | -                |
| First cancer                              | 2127 (80.5) | 923 (43.4) | 1                |                  |
| Recurrence                                | 271 (10.3)  | 125 (46.1) | 1.12 (0.87-1.44) |                  |
| 2 <sup>nd</sup> or 3 <sup>rd</sup> cancer | 243 (9.2)   | 101 (41.6) | 0.93 (0.71-1.21) |                  |
| Time since first treatment                |             |            | p = 0.625        | -                |
| <1 year                                   | 729 (27.7)  | 307 (42.1) | 1                |                  |
| 1-5 years                                 | 1260 (47.9) | 558 (44.3) | 1.09 (0.91-1.31) |                  |
| >5 years                                  | 640 (24.3)  | 275 (43.0) | 1.04 (0.84-1.28) |                  |
| Treatment(s) received                     |             |            | p = 0.132        | -                |
| Surgery                                   | 1626 (28.6) | 716 (44.0) | 1.06 (0.91-1.24) |                  |
| Chemotherapy                              | 1550 (27.3) | 665 (42.9) | 0.95 (0.81-1.11) |                  |
| Radiotherapy                              | 1400 (24.7) | 623 (44.5) | 1.09 (0.94-1.27) |                  |
| Hormonotherapy                            | 748 (13.2)  | 358 (47.6) | 1.28 (1.08-1.52) |                  |
| Immunotherapy                             | 352 (6.2)   | 149 (42.3) | 0.95 (0.76-1.19) |                  |
| Use of complementary medicine             |             |            | p < 0.001        | p = 0.008        |
| No                                        | 1782 (69.4) | 739 (41.5) | 1                | 1                |
| Yes                                       | 785 (30.6)  | 381 (48.5) | 1.33 (1.12-1.58) | 1.29 (1.07-1.55) |
| Chronic comorbidities                     |             |            | p < 0.001        | -                |
| None                                      | 1067 (40.7) | 414 (38.8) | 1                |                  |
| ≥1 other than cancer                      | 1553 (59.3) | 725 (46.7) | 1.38 (1.18-1.62) |                  |
| Overall health status                     |             |            | p < 0.001        | p < 0.001        |
| Excellent / Very good                     | 660 (25.0)  | 172 (26.1) | 1                | 1                |
| Good                                      | 1532 (57.9) | 717 (46.8) | 2.86 (2.04-3.05) | 2.23 (1.80-2.75) |
| Poor/bad                                  | 453 (17.1)  | 261 (57.6) | 3.86 (2.99-4.98) | 3.03 (2.30-4.01) |
| Depressive symptoms                       |             |            | p < 0.001        | -                |
| No                                        | 1678 (63.1) | 627 (37.4) | 1                |                  |
| Yes                                       | 980 (36.9)  | 526 (53.7) | 1.94 (1.66-2.28) |                  |
| Quality of life (0-28 highest)            |             |            | p < 0.001        | -                |
| 23-28                                     | 653 (24.7)  | 175 (26.8) | 1                |                  |
| 20-22                                     | 700 (26.5)  | 293 (41.9) | 1.97 (1.56-4.47) |                  |
| 17-19                                     | 592 (22.4)  | 282 (47.6) | 2.48 (1.96-3.15) |                  |
| 0-16                                      | 701 (26.5)  | 404 (57.6) | 3.72 (2.96-4.67) |                  |

\*Adjusted odds ratios from the multivariate model with the seven variables
